# Supplementary material
Source: publisher figshare collection journal article supplement (https://acs.figshare.com/ndownloader/files/4848538)
Supplement: Supplementary file 1 [file 4848538]

88
CAIN_P2_LIGAND_TRANS
   P    7.685398    1.469594   16.853752
   P    6.508727    4.804744   14.668820
   C    7.763882    2.377357   15.199192
   H    8.658752    3.013403   15.152307
   H    7.879968    1.597891   14.432317
   C    6.524521    3.150218   14.917079
   H    5.600427    2.569389   14.865125
   C    8.840121    2.546569   17.862147
   H    9.765349    2.717679   17.286653
   C    8.189467    3.903865   18.129338
   H    7.970736    4.415514   17.183931
   H    7.218872    3.742757   18.626627
   C    9.061913    4.788733   19.009065
   H    9.993583    5.026783   18.473132
   H    8.556132    5.744326   19.194361
   C    9.401457    4.095749   20.319782
   H   10.045392    4.731684   20.938561
   H    8.475330    3.933949   20.892742
   C   10.067582    2.752861   20.060975
   H   10.290725    2.242912   21.005754
   H   11.033733    2.920085   19.560045
   C    9.199057    1.862877   19.180248
   H    9.713176    0.910986   18.996737
   H    8.267628    1.616499   19.716076
   C    8.780578   -0.009279   16.484537
   H    8.921963   -0.477877   17.473320
   C   10.158142    0.271499   15.891468
   H   10.044062    0.781701   14.922481
   H   10.727487    0.952035   16.536456
   C   10.946222   -1.016774   15.678586
   H   11.922038   -0.792206   15.231452
   H   11.149446   -1.479468   16.656798
   C   10.173744   -2.000780   14.812733
   H   10.039218   -1.568522   13.808860
   H   10.744960   -2.926907   14.679180
   C    8.808043   -2.296713   15.414710
   H    8.942136   -2.801505   16.383722
   H    8.246465   -2.989501   14.776837
   C    8.011384   -1.015655   15.627503
   H    7.041441   -1.235617   16.090901
   H    7.790651   -0.571868   14.643207
   C    4.693861    5.076470   14.316957
   C    4.228011    5.015937   12.973322
   C    2.856109    4.940484   12.761505
   H    2.486038    4.857513   11.747657
   C    1.921844    4.963071   13.788160
   C    2.402286    5.144244   15.070839
   H    1.687407    5.217772   15.877625
   C    3.764331    5.229302   15.373456
   C    6.192131    6.142665   11.802460
   H    5.720274    7.115667   11.982608
   H    6.739074    6.201616   10.854147
   H    6.936752    5.978272   12.584461
   C    5.795134    3.674220   11.478466
   H    6.520284    3.414359   12.251596
   H    6.318399    3.679726   10.514074
   H    5.036262    2.883022   11.446271
   C    4.331312    5.349150   10.446099
   H    3.761209    6.280765   10.536832
   H    3.643821    4.542690   10.170854
   H    5.029412    5.465997    9.610701
   C    5.133269    5.037364   11.717101
   C   -0.438615    4.876897   14.714164
   H   -0.197855    4.064359   15.409251
   H   -1.490363    4.765525   14.427666
   H   -0.342459    5.829170   15.248167
   C    0.008292    5.983408   12.549183
   H   -1.061119    5.906672   12.317353
   H    0.555519    5.979718   11.601029
   H    0.184135    6.950788   13.033479
   C    0.184931    3.497583   12.760418
   H    0.483446    2.659068   13.399997
   H    0.741857    3.416924   11.821554
   H   -0.880898    3.386165   12.526495
   C    0.436405    4.833454   13.465394
   C    2.953242    6.112622   17.623036
   H    3.294915    6.383289   18.627559
   H    2.102332    5.437861   17.756160
   H    2.600726    7.026076   17.130571
   C    4.410271    4.131084   17.557382
   H    4.582182    4.295775   18.629375
   H    5.287425    3.624510   17.149654
   H    3.554564    3.453326   17.454214
   C    5.290078    6.438285   17.046778
   H    5.428942    6.640048   18.115821
   H    5.083740    7.391868   16.546314
   H    6.247657    6.067686   16.675152
   C    4.120556    5.465408   16.861454
